# Supplementary material for: Comparison of Intravenous Acetaminophen and Intravenous Patient-Controlled Analgesia Fentanyl after Total Hip Arthroplasty: A Multicenter Randomized Controlled Trial
Source: MDPI journal article supplement (doi:10.3390/jcm12237445), 2023-11-30
Supplement: s1 [file s1]

**Supplementary Table S1. Correlations between the survey items**

|        | Age              | BMI             | RP pre            | MP pre           | RP 0 h            | N 0h              | RP 4h             | N 4h              | RP 8h             | N 8h              | RP1d              | MP1d              | N1d               | RP2d              | M2d               | N2d               | RP4d              | MP4d              | N4d               |
|--------|------------------|-----------------|-------------------|------------------|-------------------|-------------------|-------------------|-------------------|-------------------|-------------------|-------------------|-------------------|-------------------|-------------------|-------------------|-------------------|-------------------|-------------------|-------------------|
| Age    |                  | -0.018<br>0.818 | -0.01<br>0.893    | -0.001<br>0.985  | -0.038<br>0.623   | 0.024<br>0.756    | -0.138<br>0.074   | -0.024<br>0.752   | -0.071<br>0.362   | -0.009<br>0.909   | -0.08<br>0.299    | -0.036<br>0.647   | 0.078<br>0.315    | -0.122<br>0.115   | -0.11<br>0.154    | -0.168*<br>0.029  | -0.105<br>0.174   | -0.049<br>0.524   | -0.084<br>0.277   |
| BMI    | -0.018<br>0.818  |                 | -0.1<br>0.206     | -0.055<br>0.489  | 0.029<br>0.713    | 0.101<br>0.203    | 0.027<br>0.737    | 0.027<br>0.731    | -0.021<br>0.795   | 0.038<br>0.633    | -0.064<br>0.419   | 0.022<br>0.776    | 0.058<br>0.467    | -0.031<br>0.699   | -0.004<br>0.957   | -0.033<br>0.681   | -0.038<br>0.627   | -0.026<br>0.745   | 0.155*<br>0.049   |
| RP pre | -0.01<br>0.893   | -0.1<br>0.206   |                   | 0.227**<br>0.003 | 0.292**<br><0.001 | 0.101<br>0.184    | 0.306**<br><0.001 | 0.048<br>0.526    | 0.352**<br><0.001 | 0.094<br>0.218    | 0.457**<br><0.001 | 0.237**<br>0.002  | -0.085<br>0.265   | 0.517**<br><0.001 | 0.218**<br>0.004  | -0.035<br>0.649   | 0.472**<br><0.001 | 0.211**<br>0.005  | 0.001<br>0.995    |
| MP pre | -0.001<br>0.985  | -0.055<br>0.489 | 0.227**<br>0.003  |                  | 0.192*<br>0.011   | -0.093<br>0.223   | 0.150*<br>0.048   | -0.071<br>0.348   | 0.167*<br>0.027   | -0.09<br>0.238    | 0.073<br>0.342    | 0.096<br>0.206    | -0.09<br>0.237    | 0.106<br>0.165    | 0.095<br>0.212    | -0.105<br>0.169   | 0.134<br>0.078    | 0.021<br>0.778    | -0.091<br>0.235   |
| RP 0h  | -0.038<br>0.623  | 0.029<br>0.713  | 0.292**<br><0.001 | 0.192*<br>0.011  |                   | 0.076<br>0.316    | 0.688**<br><0.001 | 0.072<br>0.346    | 0.665**<br><0.001 | 0.096<br>0.207    | 0.511**<br><0.001 | 0.429**<br><0.001 | 0.03<br>0.693     | 0.405**<br><0.001 | 0.373**<br><0.001 | -0.068<br>0.372   | 0.355**<br><0.001 | 0.265**<br><0.001 | -0.049<br>0.524   |
| N 0h   | 0.024<br>0.756   | 0.101<br>0.203  | 0.101<br>0.184    | -0.093<br>0.223  | 0.076<br>0.316    |                   | 0.096<br>0.221    | 0.613**<br><0.001 | 0.094<br>0.215    | 0.604**<br><0.001 | 0.133<br>0.081    | 0.071<br>0.349    | 0.300**<br><0.001 | 0.081<br>0.289    | 0.1<br>0.189      | 0.319**<br><0.001 | 0.088<br>0.25     | 0.074<br>0.329    | 0.356**<br><0.001 |
| RP4h   | -0.138<br>0.074  | 0.027<br>0.737  | 0.306**<br><0.001 | 0.150*<br>0.048  | 0.688**<br><0.001 | 0.096<br>0.221    |                   | 0.118<br>0.121    | 0.948**<br><0.001 | 0.173*<br>0.023   | 0.720**<br><0.001 | 0.613**<br><0.001 | 0.053<br>0.488    | 0.504**<br><0.001 | 0.484**<br><0.001 | 0.089<br>0.241    | 0.481**<br><0.001 | 0.398**<br><0.001 | 0.075<br>0.327    |
| N 4h   | -0.024<br>0.752  | 0.027<br>0.731  | 0.048<br>0.526    | -0.071<br>0.348  | 0.072<br>0.346    | 0.613**<br><0.001 | 0.118<br>0.121    |                   | 0.131<br>0.085    | 0.961**<br><0.001 | 0.199**<br><0.001 | 0.1<br>0.19       | 0.463**<br><0.001 | 0.160*<br>0.035   | 0.135<br>0.077    | 0.443**<br><0.001 | 0.036<br>0.633    | 0.052<br>0.496    | 0.396**<br><0.001 |
| RP 8h  | -0.071<br>0.362  | -0.021<br>0.795 | 0.352**<br><0.001 | 0.167*<br>0.027  | 0.665**<br><0.001 | 0.094<br>0.215    | 0.948**<br><0.001 | 0.131<br>0.085    |                   | 0.191*<br>0.011   | 0.742**<br><0.001 | 0.629**<br><0.001 | 0.072<br>0.346    | 0.156**<br><0.001 | 0.486**<br><0.001 | 0.072<br>0.348    | 0.486**<br><0.001 | 0.433**<br><0.001 | 0.072<br>0.344    |
| N 8h   | -0.009<br>0.909  | 0.038<br>0.633  | 0.094<br>0.218    | -0.09<br>0.238   | 0.096<br>0.207    | 0.604**<br><0.001 | 0.173*<br>0.023   | 0.961**<br><0.001 | 0.191*<br>0.011   |                   | 0.245**<br><0.001 | 0.154*<br>0.043   | 0.476**<br><0.001 | 0.188*<br>0.013   | 0.170*<br>0.025   | 0.454**<br><0.001 | 0.073<br>0.341    | 0.108<br>0.157    | 0.421**<br><0.001 |
| RP1d   | -0.08<br>0.299   | -0.064<br>0.419 | 0.457**<br><0.001 | 0.073<br>0.342   | 0.511**<br><0.001 | 0.133<br>0.081    | 0.720**<br><0.001 | 0.199**<br><0.001 | 0.742**<br><0.001 | 0.245**<br><0.001 |                   | 0.681**<br><0.001 | 0.147<br>0.053    | 0.709**<br><0.001 | 0.524**<br><0.001 | 0.172*<br>0.023   | 0.656**<br><0.001 | 0.466**<br><0.001 | 0.086<br>0.258    |
| MP1d   | -0.036<br>0.647  | 0.022<br>0.776  | 0.237**<br>0.002  | 0.096<br>0.206   | 0.429**<br><0.001 | 0.071<br>0.349    | 0.613**<br><0.001 | 0.1<br>0.19       | 0.629**<br><0.001 | 0.154*<br>0.043   | 0.681**<br><0.001 |                   | 0.132<br>0.082    | 0.495**<br><0.001 | 0.760**<br><0.001 | 0.122<br>0.11     | 0.515**<br><0.001 | 0.612**<br><0.001 | 0.03<br>0.691     |
| N1d    | 0.078<br>0.315   | 0.058<br>0.467  | -0.085<br>0.265   | -0.09<br>0.237   | 0.03<br>0.693     | 0.300**<br><0.001 | 0.053<br>0.488    | 0.463**<br><0.001 | 0.072<br>0.346    | 0.476**<br><0.001 | 0.147<br>0.053    | 0.132<br>0.082    |                   | 0.102<br>0.181    | 0.076<br>0.321    | 0.470**<br><0.001 | 0.029<br>0.704    | -0.006<br>0.94    | 0.295**<br><0.001 |
| RP2d   | -0.122<br>0.115  | -0.031<br>0.699 | 0.517**<br><0.001 | 0.106<br>0.165   | 0.405**<br><0.001 | 0.081<br>0.289    | 0.504**<br><0.001 | 0.160*<br>0.035   | 0.156**<br><0.001 | 0.188*<br>0.013   | 0.709**<br><0.001 | 0.495**<br><0.001 | 0.102<br>0.181    |                   | 0.644**<br><0.001 | 0.284**<br><0.001 | 0.813**<br><0.001 | 0.590**<br><0.001 | 0.117<br>0.123    |
| MP2d   | -0.11<br>0.154   | -0.004<br>0.957 | 0.218**<br>0.004  | 0.095<br>0.212   | 0.373**<br><0.001 | 0.1<br>0.189      | 0.484**<br><0.001 | 0.135<br>0.077    | 0.486**<br><0.001 | 0.170*<br>0.025   | 0.524**<br><0.001 | 0.760**<br><0.001 | 0.076<br>0.321    | 0.644**<br><0.001 |                   | 0.156*<br>0.04    | 0.565**<br><0.001 | 0.756**<br><0.001 | 0.031<br>0.683    |
| N2d    | -0.168*<br>0.029 | -0.033<br>0.681 | -0.035<br>0.649   | -0.105<br>0.169  | -0.068<br>0.372   | 0.319**<br><0.001 | 0.089<br>0.241    | 0.443**<br><0.001 | 0.072<br>0.348    | 0.454**<br><0.001 | 0.172*<br>0.023   | 0.122<br>0.11     | 0.470**<br><0.001 | 0.284**<br><0.001 | 0.156*<br>0.04    |                   | 0.109<br>0.151    | 0.14<br>0.066     | 0.680**<br><0.001 |
| RP4d   | -0.105<br>0.174  | -0.038<br>0.627 | 0.472**<br><0.001 | 0.134<br>0.078   | 0.355**<br><0.001 | 0.088<br>0.25     | 0.481**<br><0.001 | 0.036<br>0.633    | 0.486**<br><0.001 | 0.073<br>0.341    | 0.656**<br><0.001 | 0.515**<br><0.001 | 0.029<br>0.704    | 0.813**<br><0.001 | 0.565**<br><0.001 | 0.109<br>0.151    |                   | 0.638**<br><0.001 | 0.004<br>0.958    |

|      |        |        |         |        |         |         |         |         |         |         |         |         |         |         |         |         |         |       |       |
|------|--------|--------|---------|--------|---------|---------|---------|---------|---------|---------|---------|---------|---------|---------|---------|---------|---------|-------|-------|
| MP4d | -0.049 | -0.026 | 0.211** | 0.021  | 0.265** | 0.074   | 0.398** | 0.052   | 0.433** | 0.108   | 0.466** | 0.612** | -0.006  | 0.590** | 0.756** | 0.14    | 0.638** |       | 0.054 |
|      | 0.524  | 0.745  | 0.005   | 0.778  | <0.001  | 0.329   | <0.001  | 0.496   | <0.001  | 0.157   | <0.001  | <0.001  | 0.94    | <0.001  | <0.001  | 0.066   | <0.001  |       | 0.48  |
| N4d  | -0.084 | 0.155* | 0.001   | -0.091 | -0.049  | 0.356** | 0.075   | 0.396** | 0.072   | 0.421** | 0.086   | 0.03    | 0.295** | 0.117   | 0.031   | 0.680** | 0.004   | 0.054 |       |
|      | 0.277  | 0.049  | 0.995   | 0.235  | 0.524   | <0.001  | 0.327   | <0.001  | 0.344   | <0.001  | 0.258   | 0.691   | <0.001  | 0.123   | 0.683   | <0.001  | 0.958   | 0.48  |       |

\*\* p < 0.05: Pearson's coefficient

BMI, body mass index; RP, resting pain; MP, motion pain; N, nausea; pre, preoperatively; 0h, 0 hours; 4h, 4 hours; 8h, 8 hours; 1d, day 1; 2d, day 2; 4d, day 4
